# Supplementary material for: Nitric-Oxide-Mediated Vasodilation of Bioactive Compounds Isolated from Hypericum revolutum in Rat Aorta
Source: MDPI journal article supplement (doi:10.3390/biology10060541), 2021-06-17
Supplement: s1 [file s1]

# Nitric oxide-mediated vasodilation of bioactive compounds isolated from *Hypericum revolutum*

. Abdallah<sup>1,2,\*</sup>, Noha Z.Hossam M

Timraz<sup>1</sup>, Sabrin R. M. Ibrahim<sup>3,4</sup>, Ali M El-Halawany<sup>1,2</sup>, Azizah M. Malebari<sup>5</sup>, Ibrahim A. Shehata<sup>1,2</sup>, Hany M El-Bassossy<sup>6,7</sup>

## Supplementary Figures

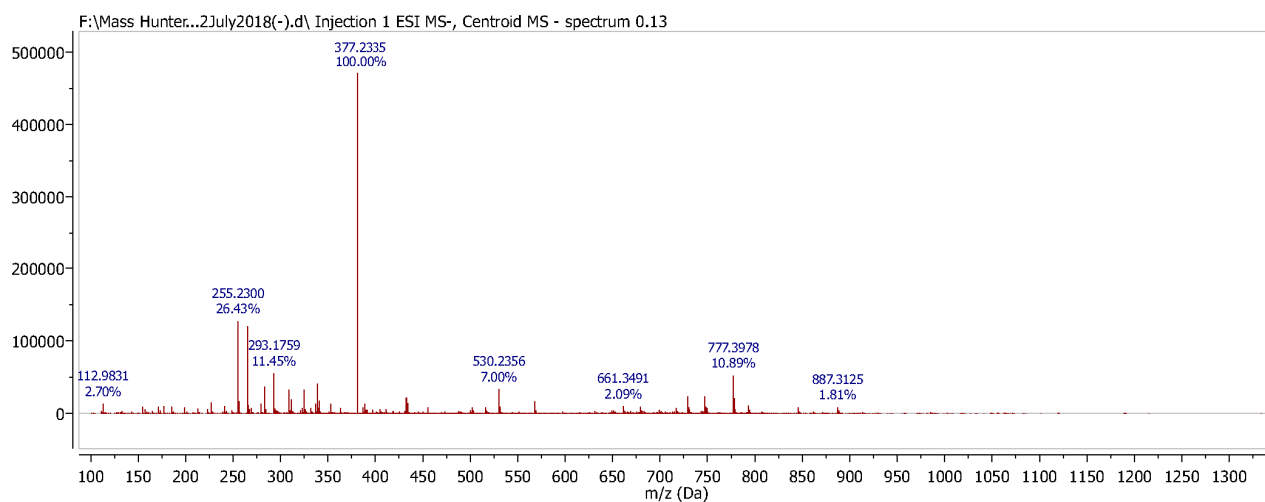

**Supplementary Figure S1.** HR- ESI, Mass spectrometry spectrum of compound **1**.

Dr. Hossam  
Sample :

HR-8-2 CDCl<sub>3</sub>

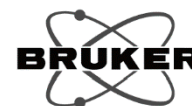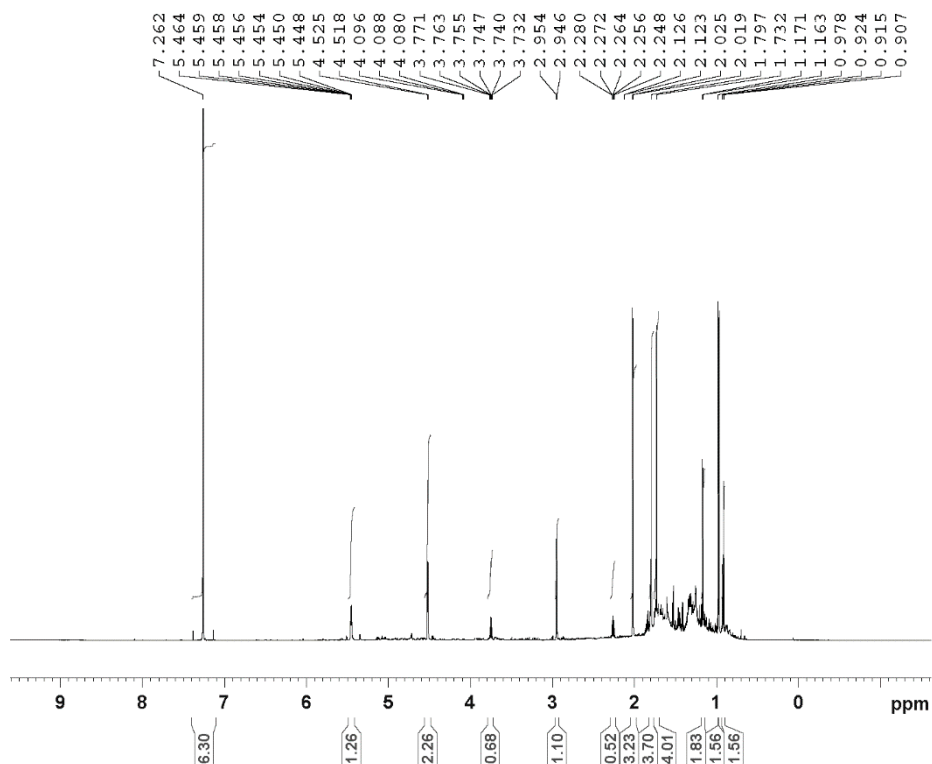

Current Data Parameters  
NAME HOSSAM HR-82 16-01-2017  
EXPNO 40  
PROCNO 1

F2 - Acquisition Parameters  
Date\_ 20170116  
Time 10.22  
INSTRUM spect  
PROBHD 5 mm CPQCI 1H-  
PULPROG zg30  
TD 65536  
SOLVENT CDCl<sub>3</sub>  
NS 64  
DS 2  
SWH 17006.803 Hz  
FIDRES 0.259503 Hz  
AQ 1.9267584 sec  
RG 10.55  
DW 29.400 usec  
DE 10.00 usec  
TE 298.0 K  
D1 1.00000000 sec  
TDO 1

===== CHANNEL f1 =====  
SF01 850.1582500 MHz  
NUC1 1H  
P1 8.00 usec  
PLW1 15.30000019 W

F2 - Processing parameters  
SI 65536  
SF 850.1500200 MHz  
WDW EM  
SSB 0  
LB 0.30 Hz  
GB 0  
PC 2.00

**Supplementary Figure S2.** <sup>1</sup>H NMR spectrum of compound **1** (CDCl<sub>3</sub>, 850 Hz).

Dr. Hossam  
Sample : HR-82 CDCl<sub>3</sub>

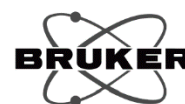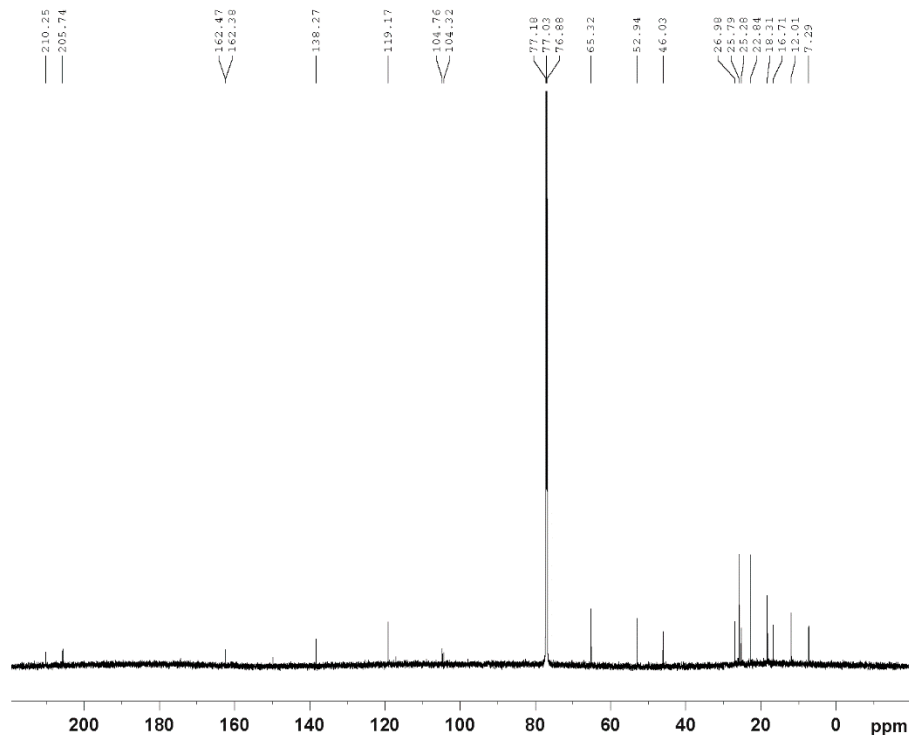

Current Data Parameters  
NAME HOSSAM HR-82 18-01-2017  
EXPNO 40  
PROCNO 1

F2 - Acquisition Parameters  
Date\_ 20170118  
Time 14.25  
INSTRUM spect  
PROBHD 5 mm CPQCI 1H-  
PULPROG zgpg30  
TD 65536  
SOLVENT CDCl<sub>3</sub>  
NS 2560  
DS 4  
SWH 51020.406 Hz  
FIDRES 0.773510 Hz  
AQ 0.6422528 sec  
RG 186.93  
DM 9.900 usec  
DE 19.00 usec  
TE 299.0 K  
D1 2.00000000 sec  
D11 0.03000000 sec  
TDO 1

===== CHANNEL f1 =====  
SFO1 213.7917636 MHz  
NUC1 13C  
P1 12.00 usec  
PL1 130.0000000 W

===== CHANNEL f2 =====  
SFO2 850.1534006 MHz  
NUC2 1H  
CPDPRG2 waltz16  
PCPD2 80.00 usec  
PLW2 13.80000019 W  
PLW12 0.13800000 W  
PLW13 0.08833000 W

F2 - Processing parameters  
SI 32768  
SF 213.7703875 MHz  
WDW HN  
SSB 0  
LB 1.50 Hz  
GB 0  
PC 2.00

**Supplementary Figure S3.** <sup>13</sup>C NMR spectrum of compound **1** (CDCl<sub>3</sub>, 214 Hz).

Dr.Hossam  
Sample : HR-8-2

CDCL3

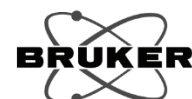

Current Data Parameters  
NAME HOSSAM HR-8-2  
EXPNO 23  
PROCNO 1

F2 - Acquisition Parameters  
Date\_ 20170322  
Time 16.01  
INSTRUM spect  
PROBHD 5 mm CPQCI 1H-  
PULPROG hsqc-rectop  
TD 1024  
SOLVENT CDCL3  
RG 22  
DE 1.6  
B0H 989.922 Hz  
FIDRES 0.571442 Hz  
AQ 0.0322249 sec  
RG 166.53  
DE 51.000 usec  
DM 10.00 usec  
TE 298.0 K  
COST2 145.000000  
DO 0.0000000 sec  
D1 1.48419701 sec  
D4 0.00172414 sec  
D11 0.00000000 sec  
D13 0.00000000 sec  
D16 0.00000000 sec  
D21 0.00345000 sec  
D22 0.00001410 sec  
EQUPTS 0.00001410 sec

===== CHANNEL f1 =====  
NUC1 13C  
P1 8.00 usec  
P2 16.00 usec  
P4H 11.50000019 Hz

===== CHANNEL f2 =====  
SFO2 213.7863116 MHz  
NUC2 13C  
CPDPRG2 gmp  
P3 15.00 usec  
P4 24.00 usec  
P5 15.00 usec  
P6H2 130.00000000 Hz  
P6H12 9.24440002 Hz

===== GRADIENT CHANNEL =====  
GPRAM11 SMC10.100  
GPRAM12 SMC10.100  
GPR1 20.00 Hz  
GPR2 20.00 Hz  
P15 1000.00 usec

F1 - Acquisition parameters  
TD 256  
SFO1 213.7863 MHz  
FIDRES 134.519301 Hz  
B0 151.873 ppm  
FAMCDS Echo-NotEcho

F2 - Processing parameters  
ET 1024  
SF 450.1500000 MHz  
NCH QTHS  
LA 0 Hz  
GB 0  
PC 1.40

F1 - Processing parameters  
ET 1024  
NCH echo-notecho  
SF 213.7703875 MHz  
NCH QTHS  
LA 0 Hz  
GB 0

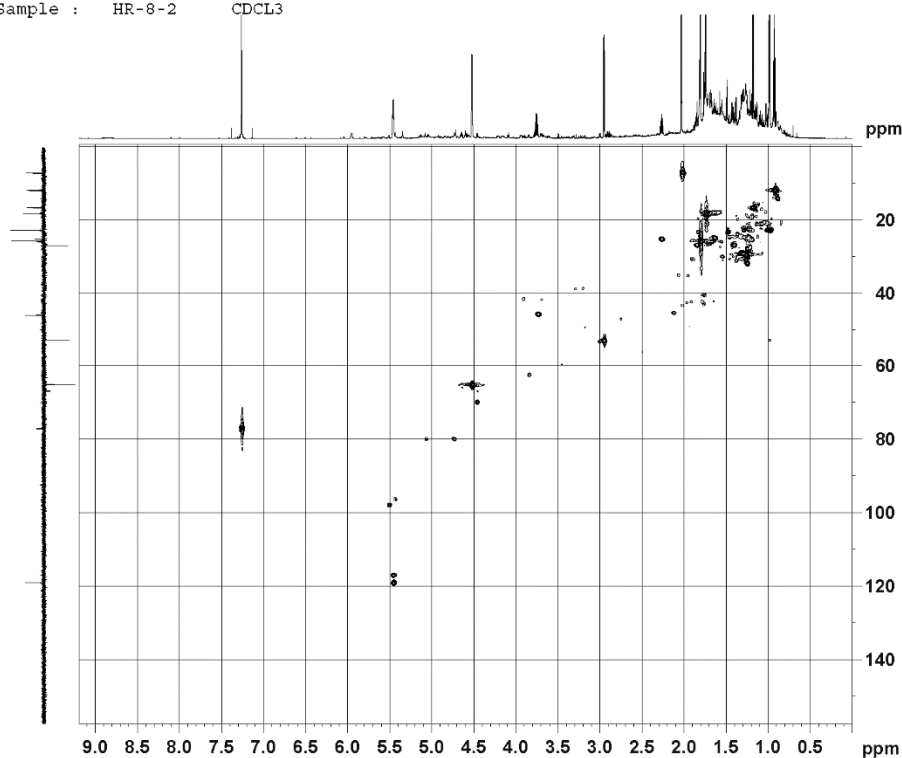

Supplementary Figure S4. HSQC spectrum of compound 1

Dr. Hossam  
Sample : HR-8-2

CDCL3

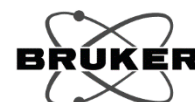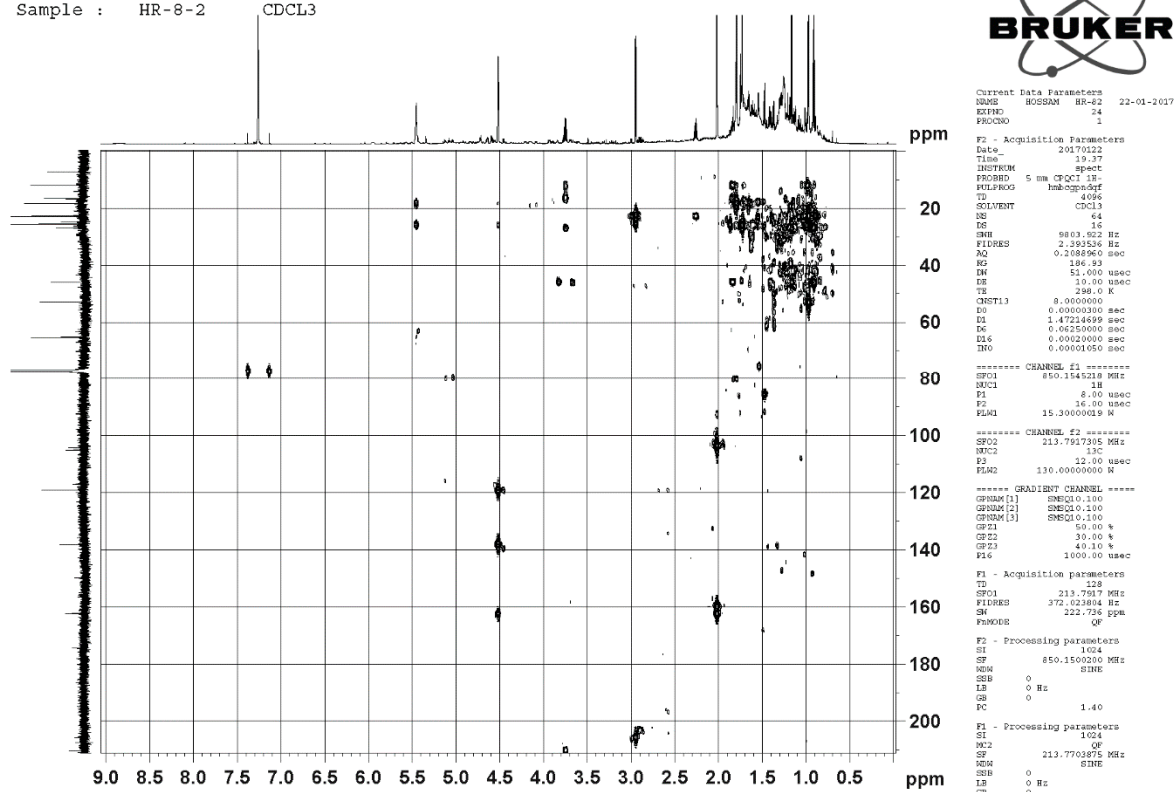

Supplementary Figure S5. HMBC spectrum of compound 1.

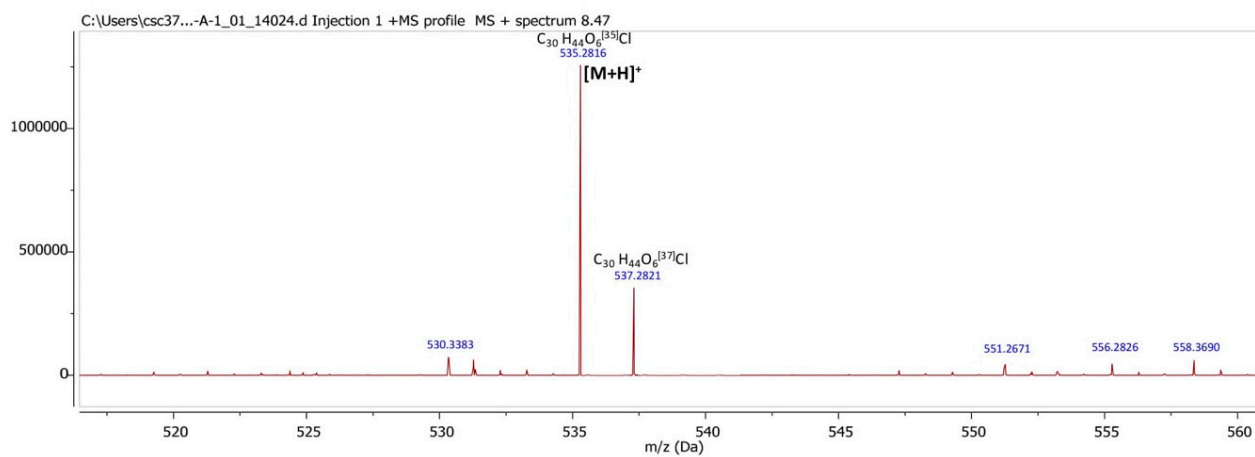

**Supplementary Figure S6.** HR- ESI, Mass spectrometry spectrum of compound **2**.

Dr.Hossam  
Sample :

HR-8-3

CDCL<sub>3</sub>

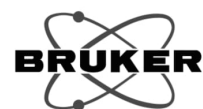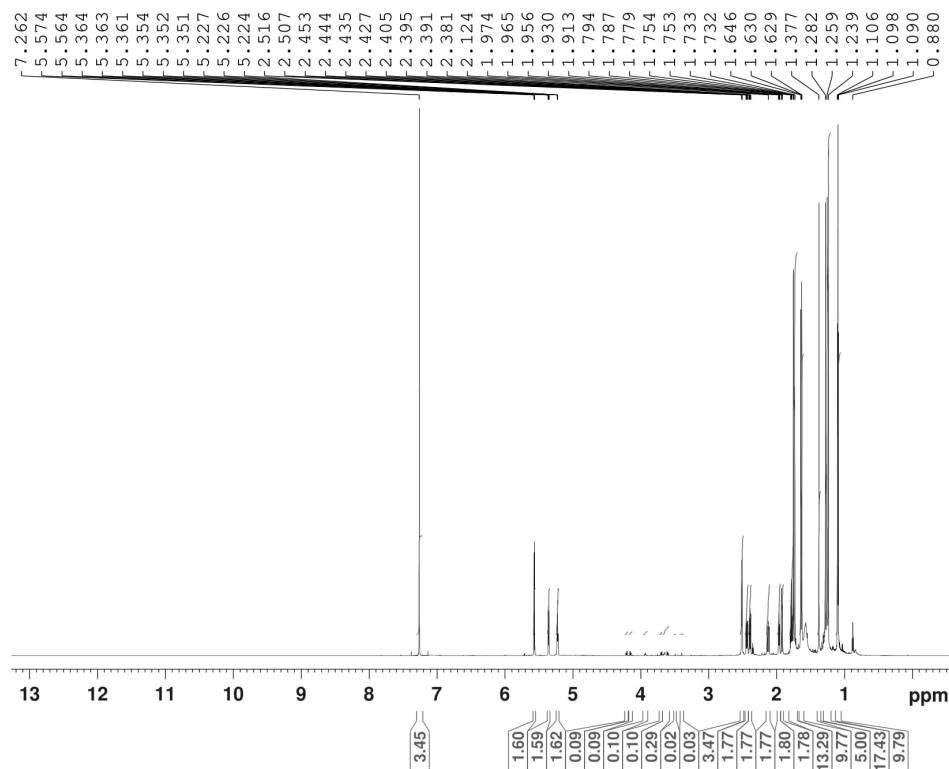

Current Data Parameters  
NAME HOSSAM HR-83 16-01-2017  
EXPNO 30  
PROCNO 1

F2 - Acquisition Parameters  
Date\_ 20170116  
Time 10.15  
INSTRUM spect  
PROBHD 5 mm CPQCI 1H-  
PULPROG zg30  
TD 65536  
SOLVENT CDCL3  
NS 64  
DS 2  
SWH 17006.803 Hz  
FIDRES 0.259503 Hz  
AQ 1.9267584 sec  
RG 10.55  
DW 29.400 usec  
DE 10.00 usec  
TE 298.0 K  
D1 1.00000000 sec  
TD0 1

===== CHANNEL f1 =====  
SF01 850.1552500 MHz  
NUC1 1H  
P1 8.00 usec  
PLW1 15.30000019 W

F2 - Processing parameters  
SI 65536  
SF 850.1500200 MHz  
WDW EM  
SSB 0  
LB 0.30 Hz  
GB 0  
PC 2.00

**Supplementary Figure S7.** <sup>1</sup>H NMR spectrum of compound **2** (CDCl<sub>3</sub>, 850 Hz).

Dr.Hossam

Sample : HR-83 CDCL<sub>3</sub>

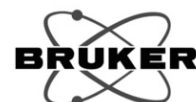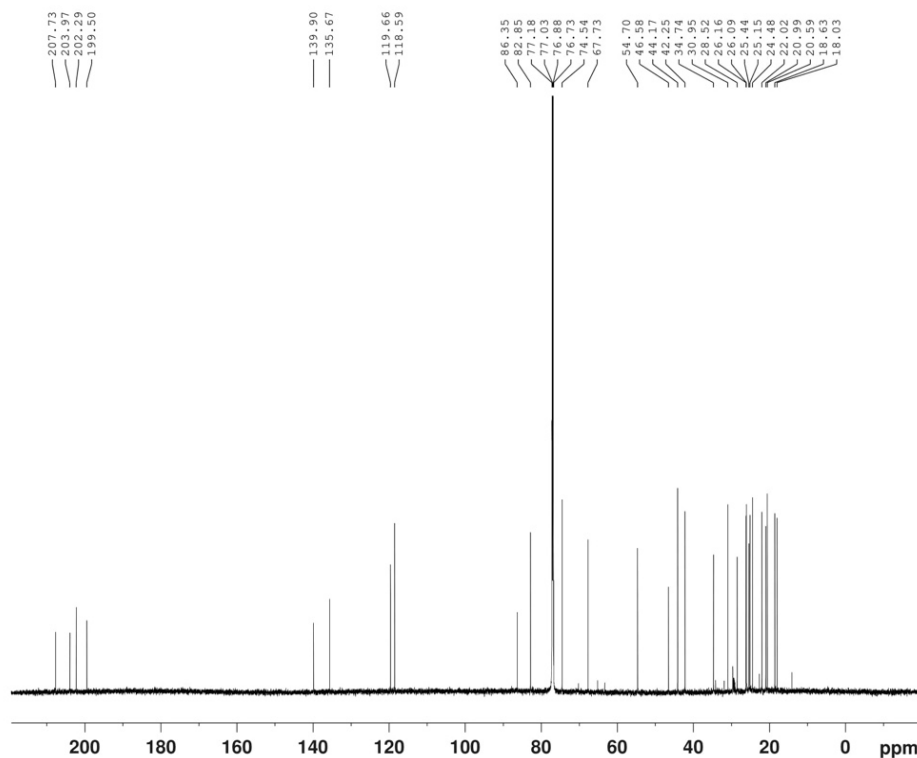

```

Current Data Parameters
NAME      HOSSAM   HR-83   18-01-2017
EXPNO     10
PROCNO    1

F2 - Acquisition Parameters
Date_     20170118
Time      11.59
INSTRUM   spect
PROBHD    5 mm CPQCI 1H-
PULPROG   zgpg30
TD         65536
SOLVENT   CDCl3
NS         993
DS         4
SWH        51020.406 Hz
FIDRES     0.778510 Hz
AQ         0.6422528 sec
RG         186.93
DW         9.800 usec
DE         18.00 usec
TE         298.0 K
D1         2.00000000 sec
D11        0.03000000 sec
TDO        1

===== CHANNEL f1 =====
SF01       213.7917636 MHz
NUC1       13C
P1         12.00 usec
PLW1       130.0000000 W

===== CHANNEL f2 =====
SF02       850.1534006 MHz
NUC2       1H
CPDPRG2    Waltz16
PCPD2      80.00 usec
PLW2       13.80000019 W
PLW12      0.13800000 W
PLW13      0.08832000 W

F2 - Processing parameters
SI         32768
SF         213.7703875 MHz
WDW        EM
SSB        0
LB         1.50 Hz
GB         0
PC         2.00

```

**Supplementary Figure S8.** <sup>13</sup>C NMR spectrum of compound **2** (CDCl<sub>3</sub>, 214 Hz).



Dr.Hossam  
Sample : HR-8-3 CDCL3

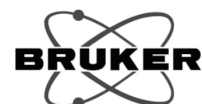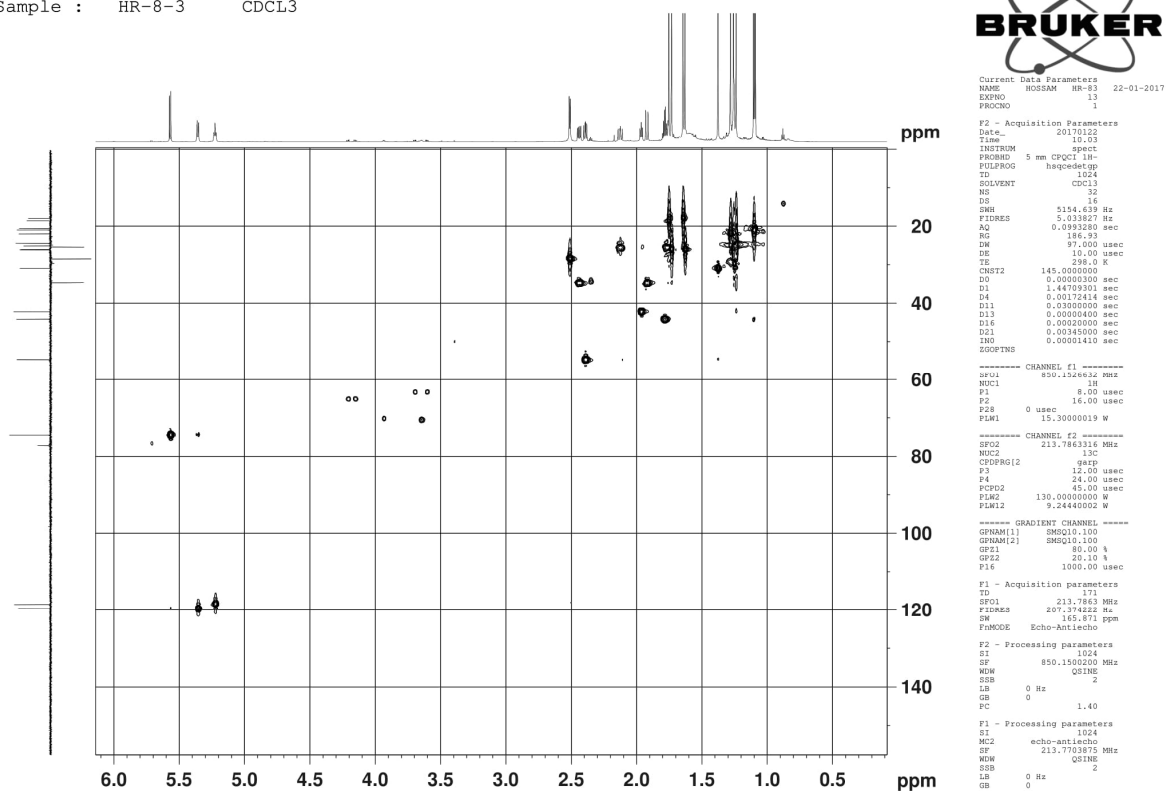

Supplementary Figure S9. HSQC spectrum of compound 2

Dr. Hossam  
Sample : HR-8-3 CDCL<sub>3</sub>

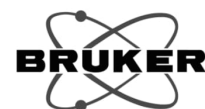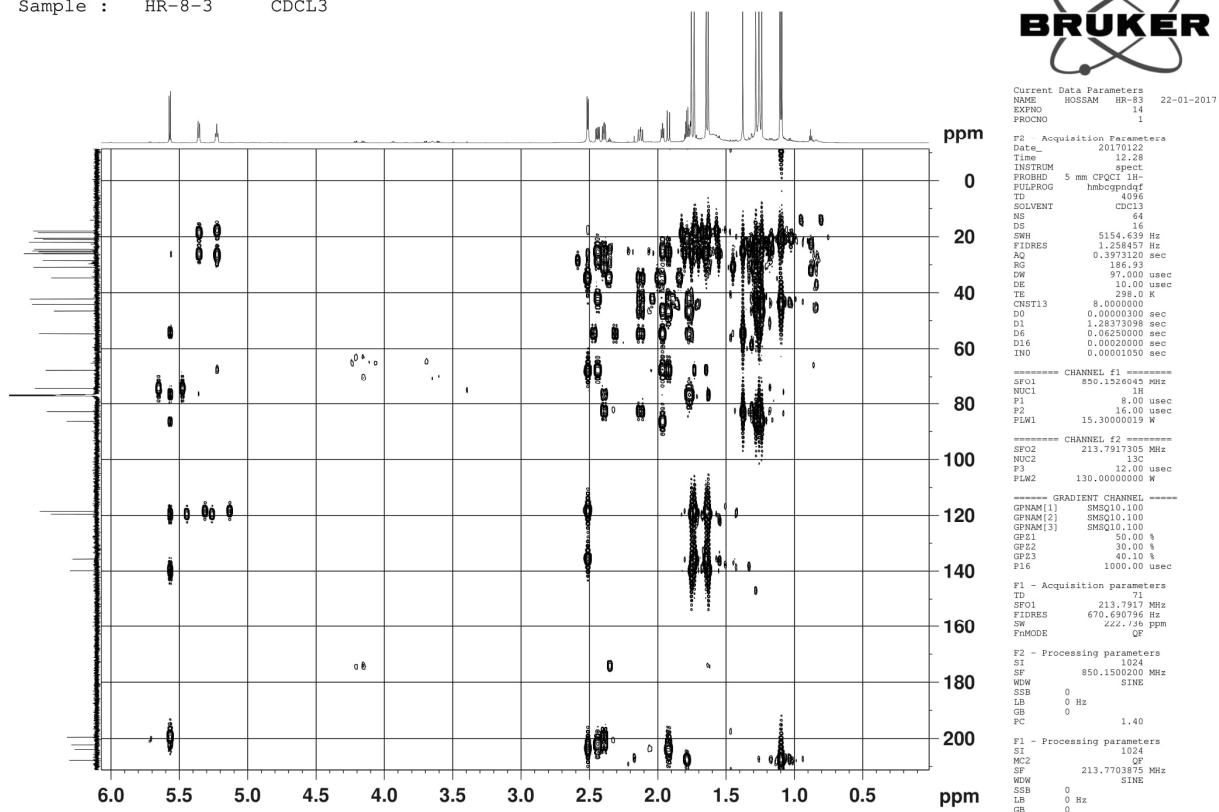

Supplementary Figure S10. HMBC spectrum of compound 2

Dr.Hossam  
Sample : HR-8-3

CDCL3

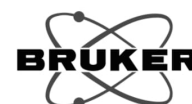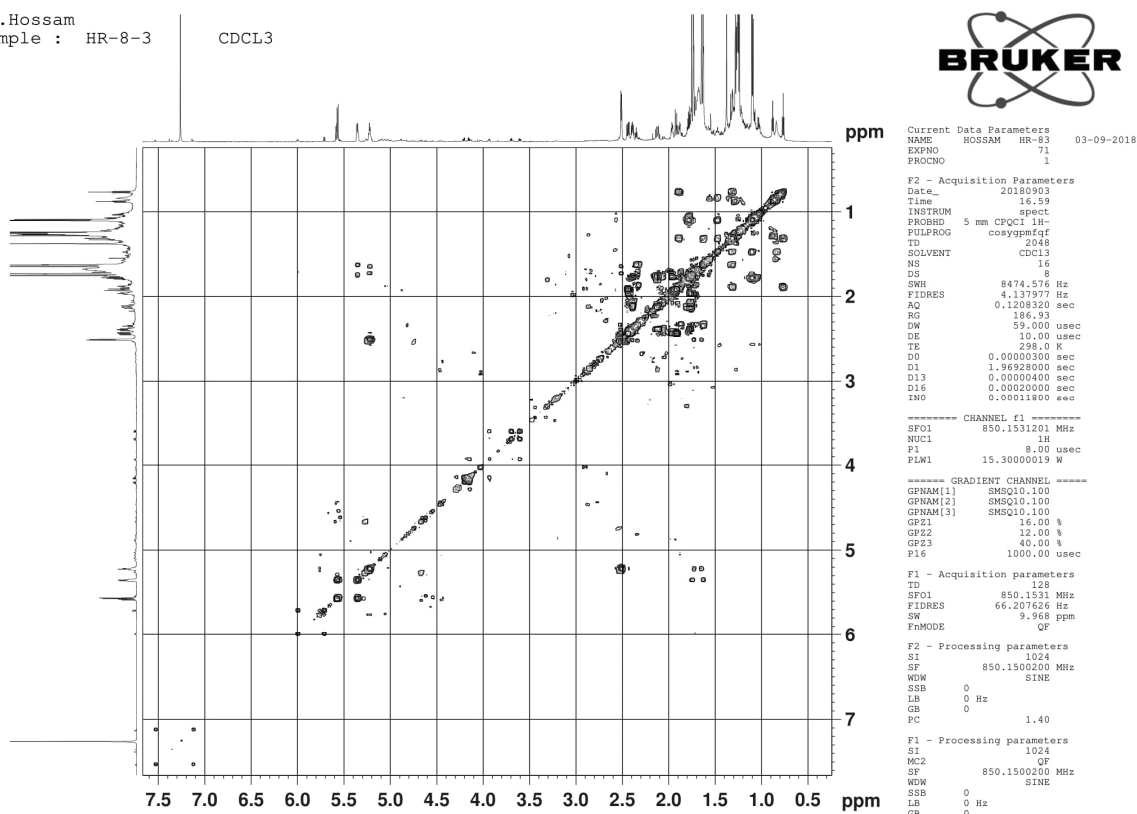

**Supplementary Figure S11.** COSY spectrum of compound **2**

Dr.Hossam  
Sample : HR-8-3

CDCL3

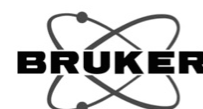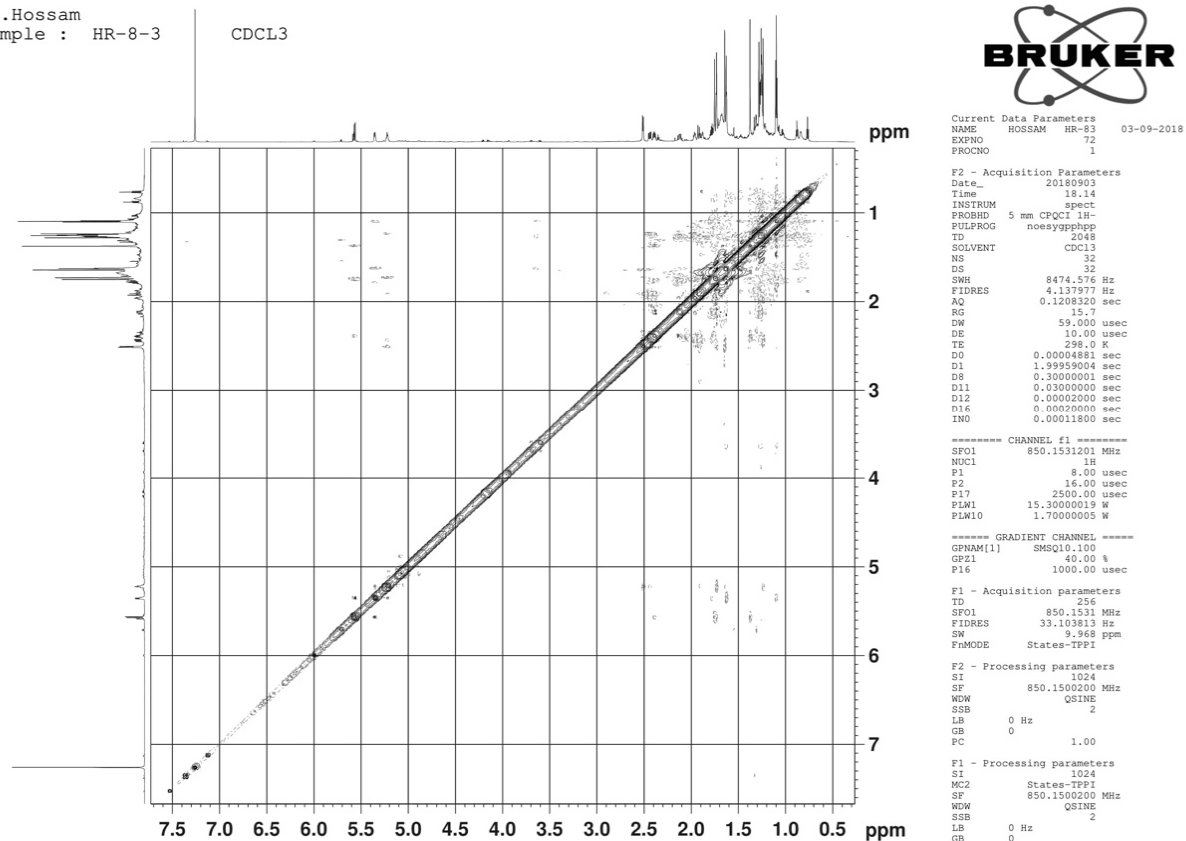

Supplementary Figure S12. NOESY spectrum of compound 2

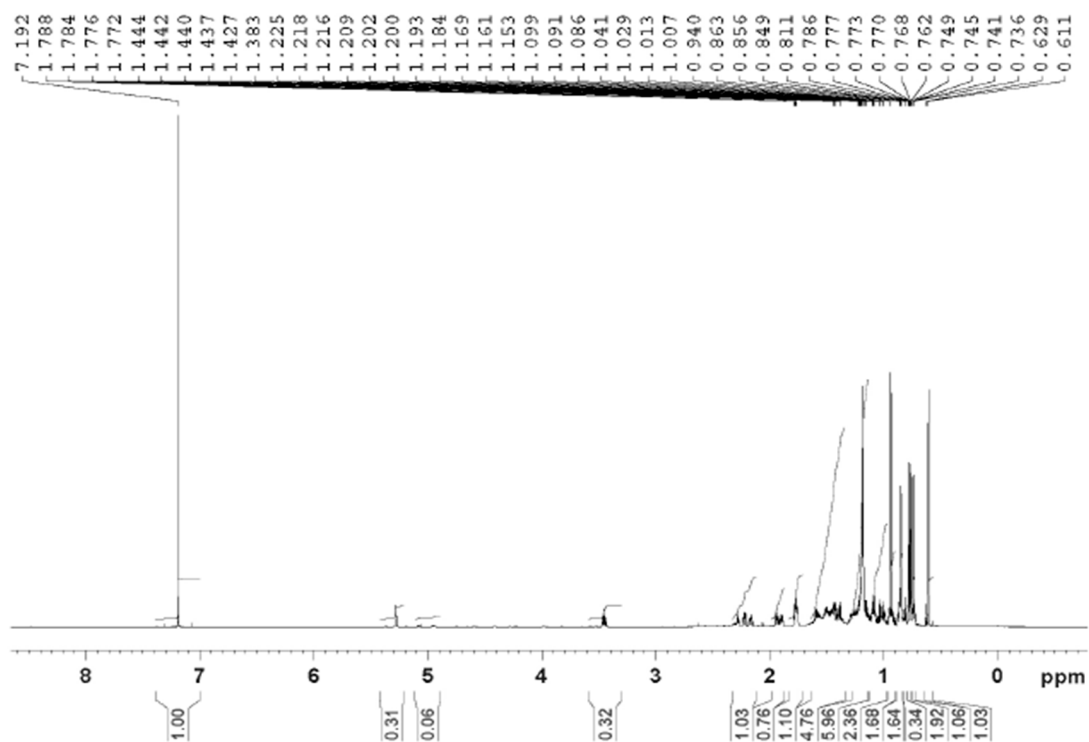

**Supplementary Figure S13:**  $^1\text{H}$  NMR spectrum of compound **3** ( $\text{CDCl}_3$ , 850 Hz).

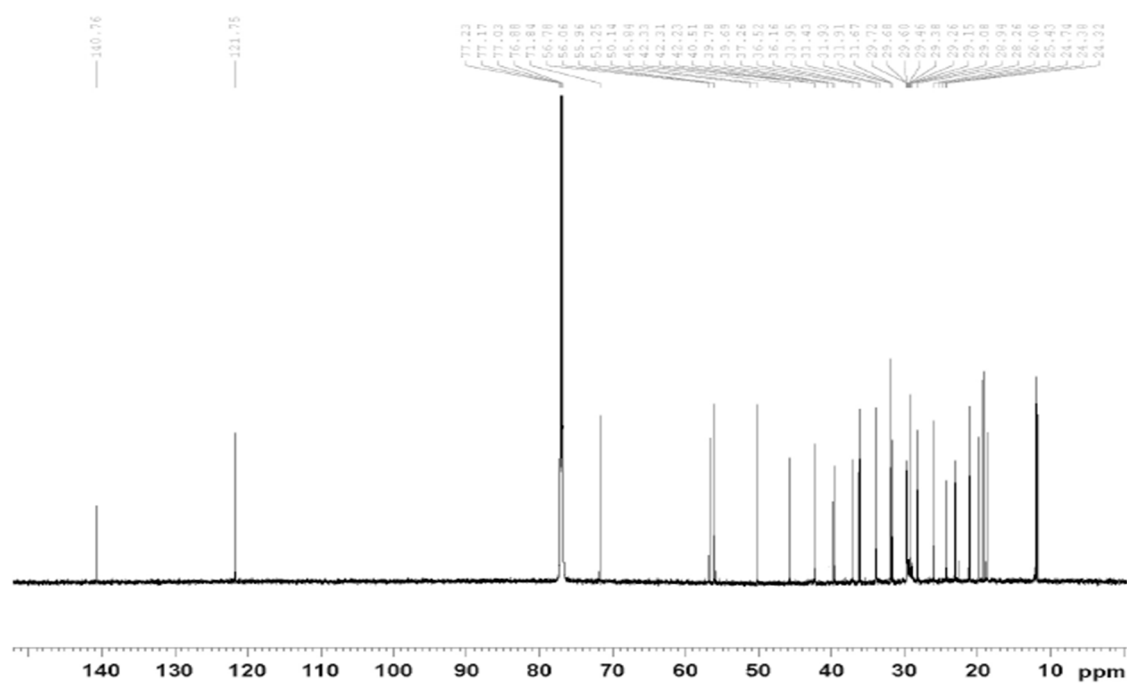

**Supplementary Figure S14:**  $^{13}\text{C}$  NMR spectrum of compound **3** ( $\text{CDCl}_3$ , 214 Hz).

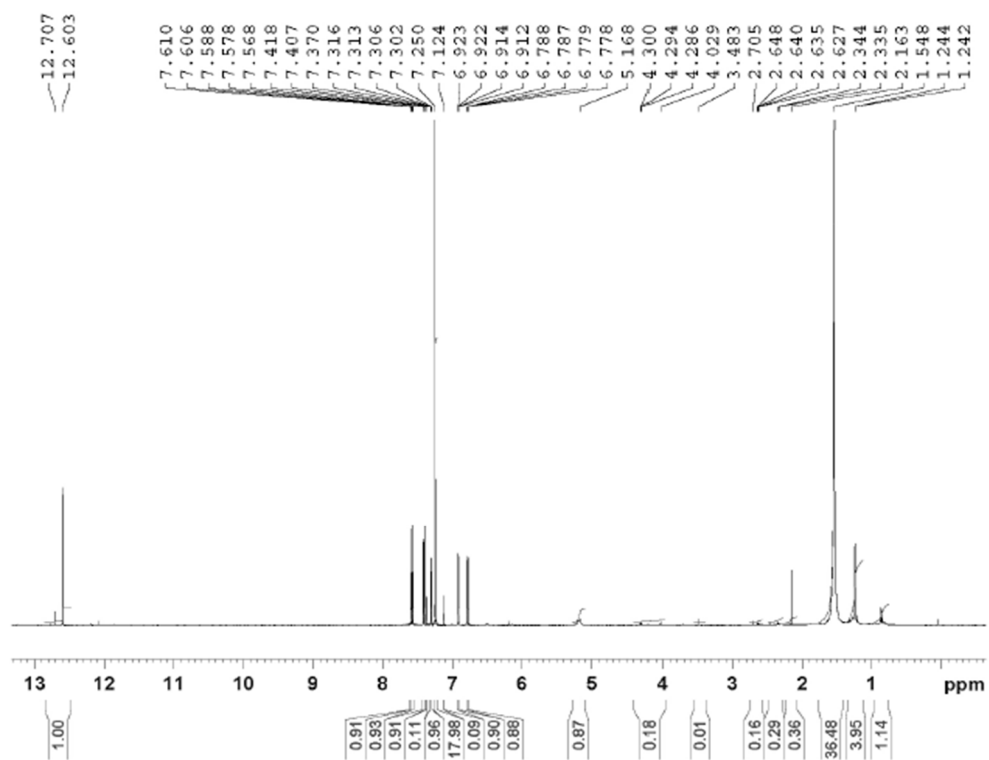

**Supplementary Figure S15:**  $^1\text{H}$  NMR spectrum of compound 4 (euxanthone) ( $\text{CDCl}_3$ , 850 Hz).

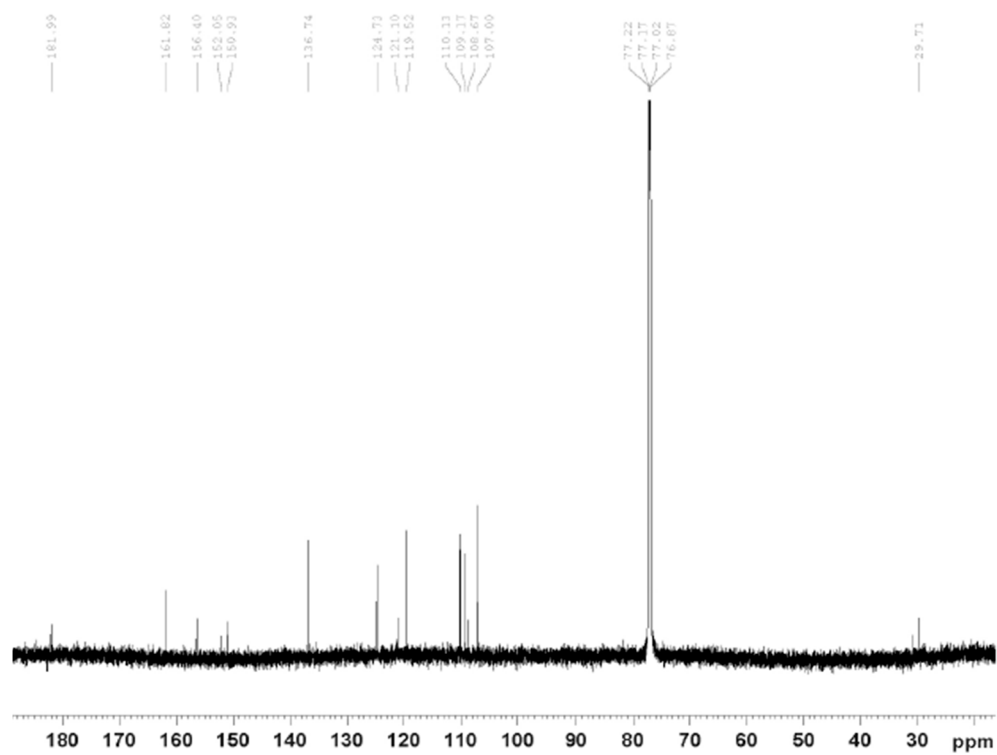

**Supplementary Figure S16:** <sup>13</sup>C NMR spectrum of compound **4** (euxanthone) (CDCl<sub>3</sub>, 214 Hz).



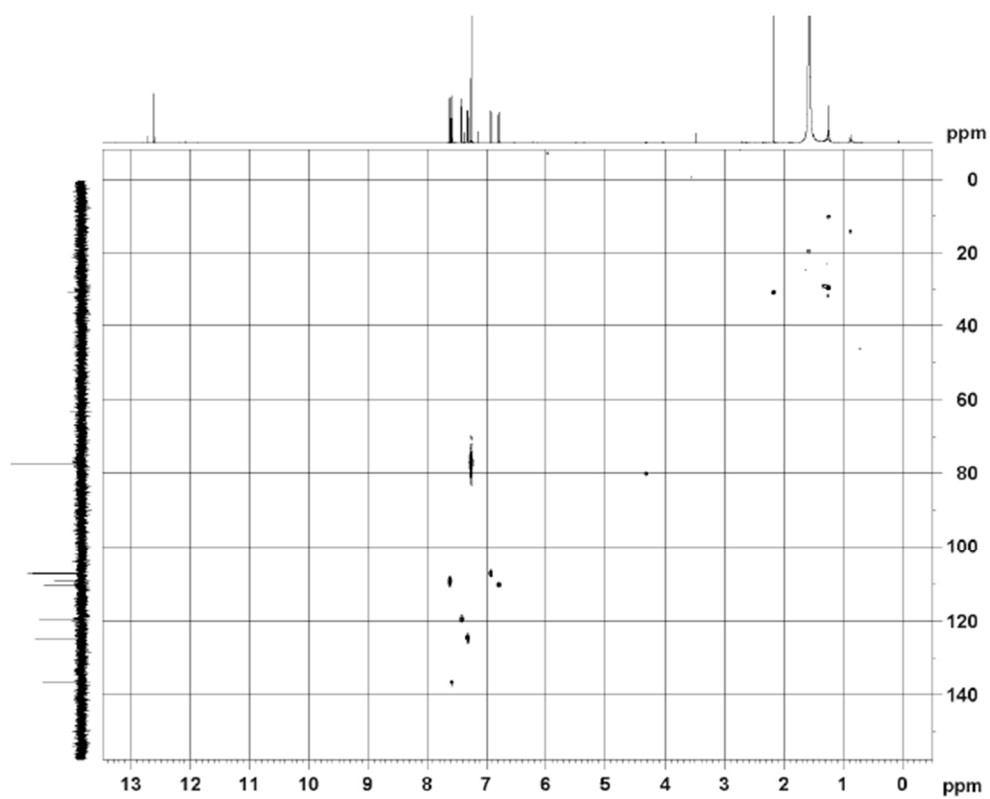

**Supplementary Figure S17:** HSQC spectrum of compound **4** (euxanthone)

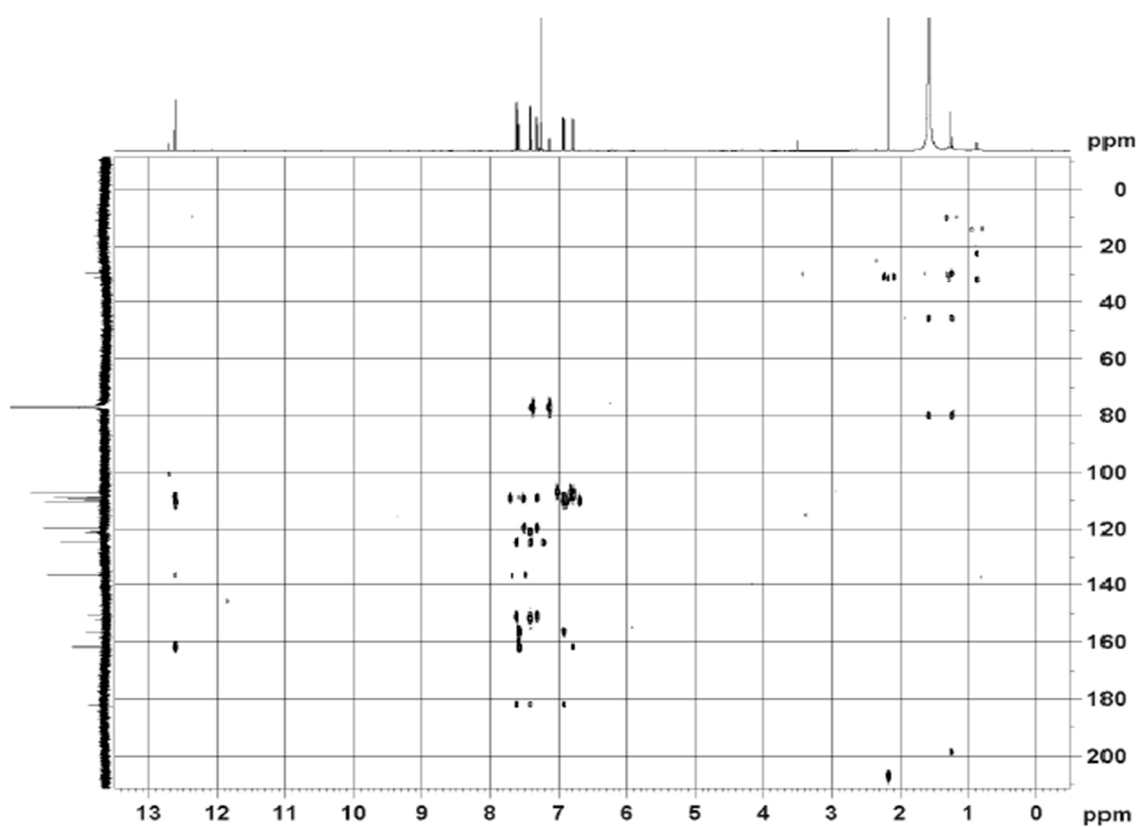

**Supplementary Figure S18:** HMBC spectrum of compound **4** (euxanthone)

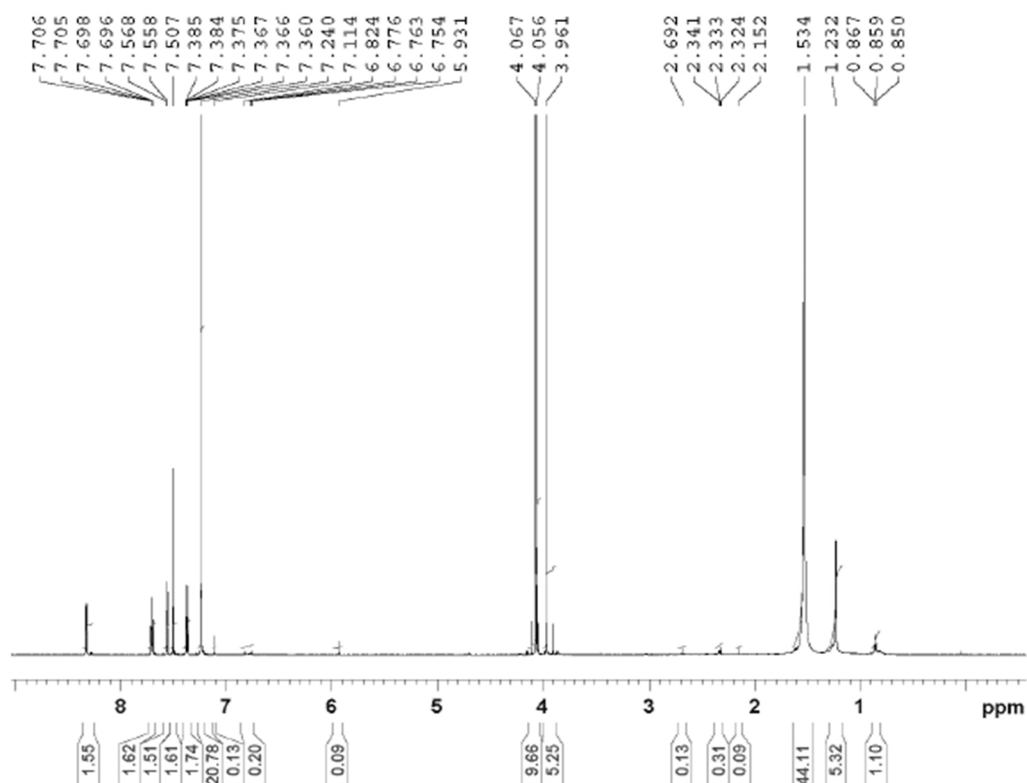

**Supplementary Figure S19:** <sup>1</sup>H NMR spectrum of compound **5** (2,3,4-trimethoxy xanthone) (CDCl<sub>3</sub>, 850 Hz).

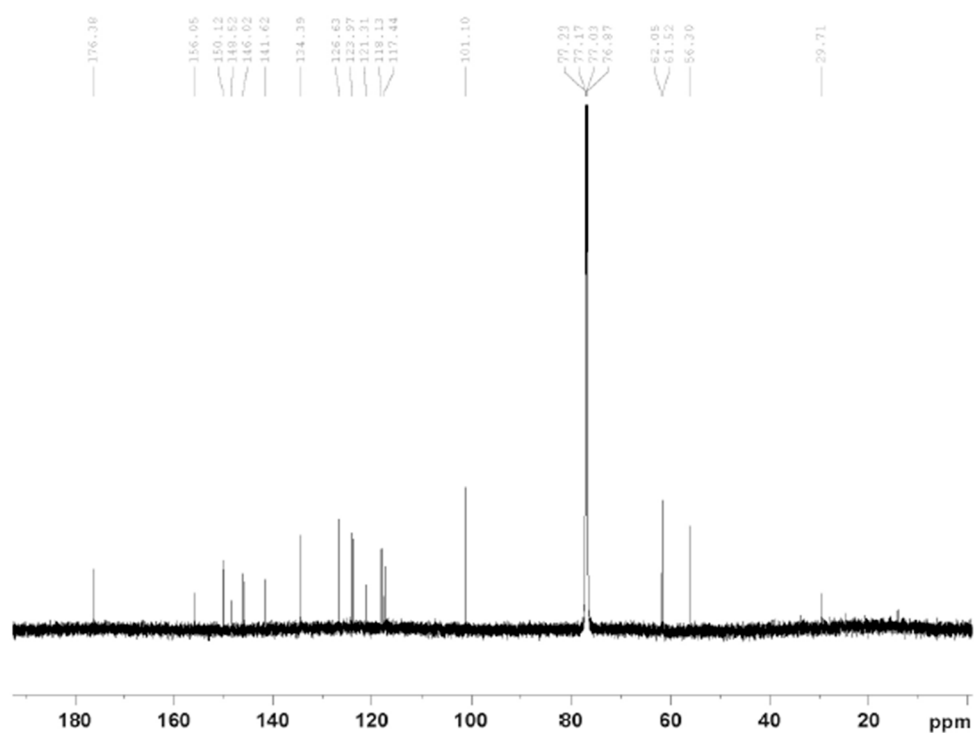

**Supplementary Figure S20:** <sup>13</sup>C NMR spectrum of compound **5** (2,3,4-trimethoxy xanthone) (CDCl<sub>3</sub>, 214 Hz).

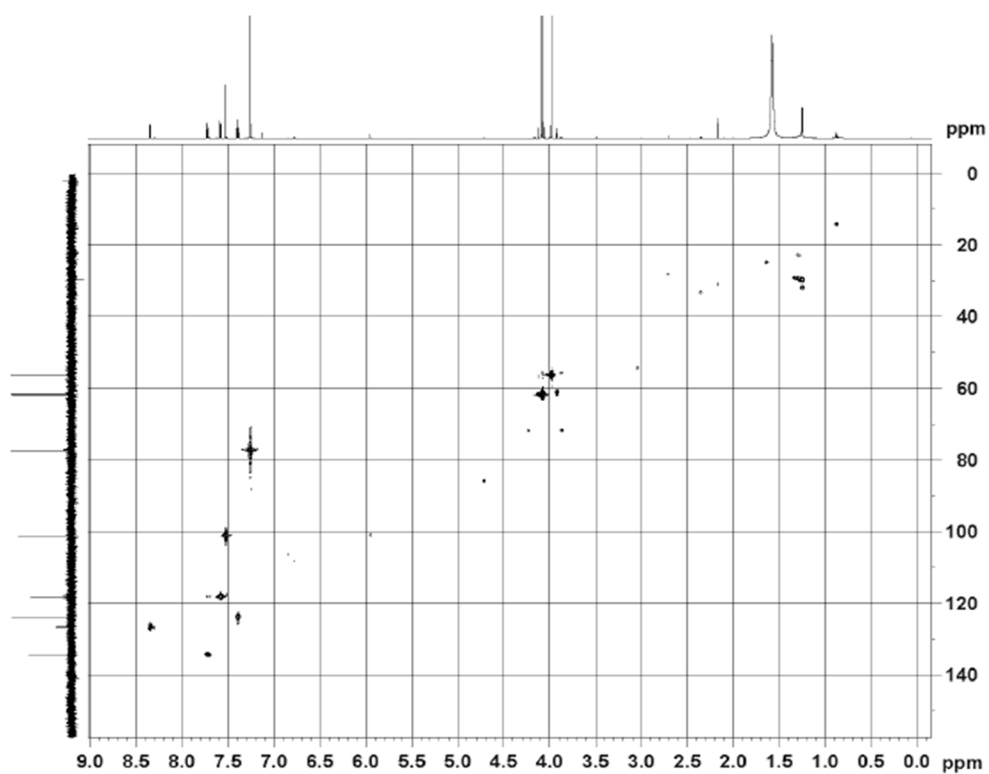

**Supplementary Figure S21:** HSQC spectrum of compound **5** (2,3,4-trimethoxy xanthone)

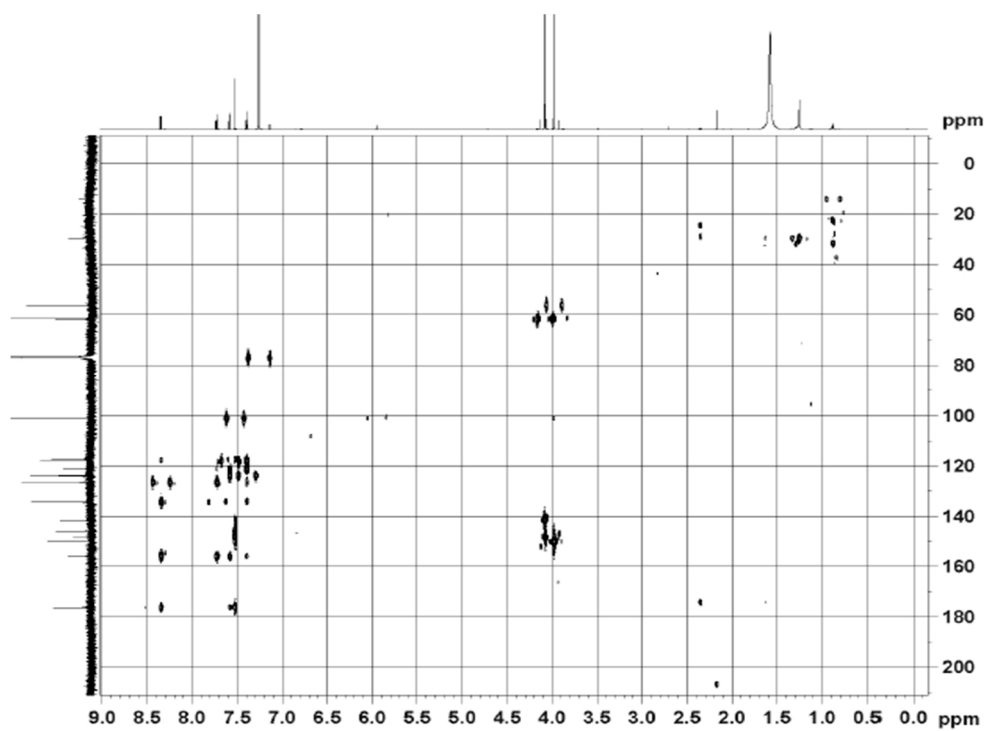

**Supplementary Figure S22:** HMBC spectrum of compound **5** (2,3,4-trimethoxy xanthone)

## Supplementary Tables

**Supplementary Table S1:** NMR data of compound **3** (CDCl<sub>3</sub>, 850 and 214 Hz).

| No. | $\delta_{\text{H}}$ [mult., <i>J</i> (Hz)] | $\delta_{\text{C}}$ (mult.) |
|-----|--------------------------------------------|-----------------------------|
| 1   | 1.83, 1.07 m                               | 37.3 CH <sub>2</sub>        |
| 2   | 1.45, 1.23 m                               | 31.9 CH <sub>2</sub>        |
| 3   | 3.45 m                                     | 71.8 CH                     |
| 4   | 1.95, 1.83 m                               | 42.3 CH <sub>2</sub>        |
| 5   | -                                          | 140.8 C                     |
| 6   | 5.28 m                                     | 121.8 CH                    |
| 7   | 1.97, 1.83 m                               | 31.7 CH <sub>2</sub>        |
| 8   | 1.51 m                                     | 31.9 CH                     |
| 9   | 0.92 m                                     | 50.1 CH                     |
| 10  | -                                          | 36.5 C                      |
| 11  | 1.45 m                                     | 21.1 CH <sub>2</sub>        |
| 12  | 1.99, 1.51 m                               | 39.7 CH <sub>2</sub>        |
| 13  | 2.28, 2.23 m                               | 42.3 CH <sub>2</sub>        |
| 14  | 0.98 m                                     | 56.8 CH                     |
| 15  | 1.58, 1.03 m                               | 24.3 CH <sub>2</sub>        |
| 16  | 1.84, 1.25 m                               | 28.3 CH <sub>2</sub>        |
| 17  | 1.09 m                                     | 56.1 CH                     |
| 18  | 0.61 s                                     | 11.9 CH <sub>3</sub>        |
| 19  | 0.94 s                                     | 19.4 CH <sub>3</sub>        |
| 20  | 1.38 m                                     | 36.2 CH                     |
| 21  | 0.84 d (6.4)                               | 19.0 CH <sub>3</sub>        |
| 22  | 1.32, 1.11 m                               | 34.0 CH <sub>2</sub>        |
| 23  | 1.13 m                                     | 26.1 CH <sub>2</sub>        |
| 24  | 0.93 m                                     | 45.8 CH                     |
| 25  | 1.65 m                                     | 29.2 CH                     |
| 26  | 0.74 d (6.7)                               | 18.8 CH <sub>3</sub>        |
| 27  | 0.76 d (6.7)                               | 19.8 CH <sub>3</sub>        |
| 28  | -                                          | 23.1 CH <sub>2</sub>        |
| 29  | 0.77 t (6.9)                               | 12.0 CH <sub>3</sub>        |

**Supplementary Table S2:** NMR data of compound **4** (euxanthone) (CDCl<sub>3</sub>, 850 and 214 Hz).

| No.         | $\delta_{\text{H}}$ [mult., $J$ (Hz)] | $\delta_{\text{C}}$ (mult.) | HMBC         |
|-------------|---------------------------------------|-----------------------------|--------------|
| <b>1</b>    | -                                     | 161.8 C                     | -            |
| <b>2</b>    | 6.78 dd (2.1, 8.5)                    | 110.1 CH                    | 1, 2, 8b     |
| <b>3</b>    | 7.58 t (8.5)                          | 136.7 CH                    | 1, 4a, 8b    |
| <b>4</b>    | 6.92 dd (2.1, 8.5)                    | 107.0 CH                    | 2, 4a, 8b    |
| <b>4a</b>   | -                                     | 156.4 C                     | -            |
| <b>4b</b>   | -                                     | 150.9 C                     | -            |
| <b>5</b>    | 7.41 d (8.5)                          | 119.5 CH                    | 6, 7, 8a     |
| <b>6</b>    | 7.31 dd (2.5, 8.5)                    | 124.7 CH                    | 5, 8, 4b     |
| <b>7</b>    | -                                     | 152.1 C                     | -            |
| <b>8</b>    | 7.61 d (2.5)                          | 109.2 CH                    | -            |
| <b>8a</b>   | -                                     | 121.1C                      | -            |
| <b>8b</b>   | -                                     | 108.7 C                     | -            |
| <b>9</b>    | -                                     | 182.0 C                     |              |
| <b>1-OH</b> | 12.6 s                                | -                           | 1, 3, 4a, 8b |



**Supplementary Table S3:** NMR data of compound **5** (2,3,4-trimethoxy xanthone) (CDCl<sub>3</sub>, 850 and 214 Hz).

| No.                | $\delta_{\text{H}}$ [mult., <i>J</i> (Hz)] | $\delta_{\text{C}}$ (mult.) | HMBC     |
|--------------------|--------------------------------------------|-----------------------------|----------|
| 1                  | 7.51 s                                     | 101.1 CH                    | 3, 4a, 9 |
| 2                  | -                                          | 141.6 C                     | -        |
| 3                  | -                                          | 148.5 C                     | -        |
| 4                  | -                                          | 150.1 C                     | -        |
| 4a                 | -                                          | 146.2 C                     | -        |
| 4b                 | -                                          | 156.1 C                     | -        |
| 5                  | 7.56 brd (8.5)                             | 118.1 CH                    | 7, 8a    |
| 6                  | 7.71 dt (1.7, 8.5)                         | 134.4 CH                    | 8, 4b    |
| 7                  | 7.38 t (8.5)                               | 124.0 CH                    | 3, 5, 8a |
| 8                  | 8.32 dd (1.7, 8.5)                         | 126.6 CH                    | 4b, 6    |
| 8a                 | -                                          | 121.1 Cs                    | -        |
| 8b                 | -                                          | 117.4 C                     | -        |
| 9                  | -                                          | 176.4 C                     | -        |
| 2-OCH <sub>3</sub> | 4.07 s                                     | 56.3 CH <sub>3</sub>        | 2, 8b    |
| 3-OCH <sub>3</sub> | 4.06 s                                     | 61.5 CH <sub>3</sub>        | 3, 4a    |
| 4-OCH <sub>3</sub> | 3.96 s                                     | 61.1 CH <sub>3</sub>        | 4, 8b    |
